# Supplementary material for: Expression of the chemokine CXCL14 in the tumour stroma is an independent marker of survival in breast cancer
Source: PubMed Central journal article supplement — Br J Cancer. 2016 Apr 26;114(10):1117–24. doi: 10.1038/bjc.2016.104 (PMC4865967; doi:10.1038/bjc.2016.104), 2016-04-26
Supplement: bjc2016104x1.pdf [file bjc2016104x1.pdf]

Supplementary Figure 1.

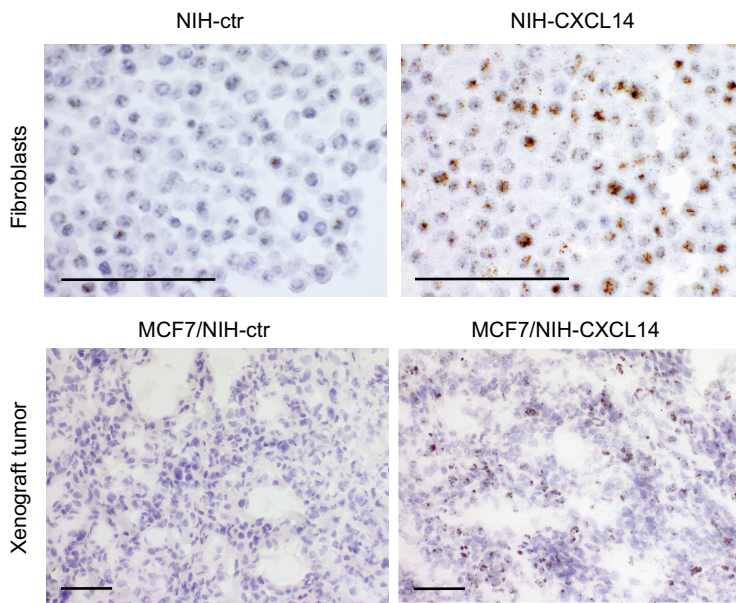

Supplementary Figure 2.

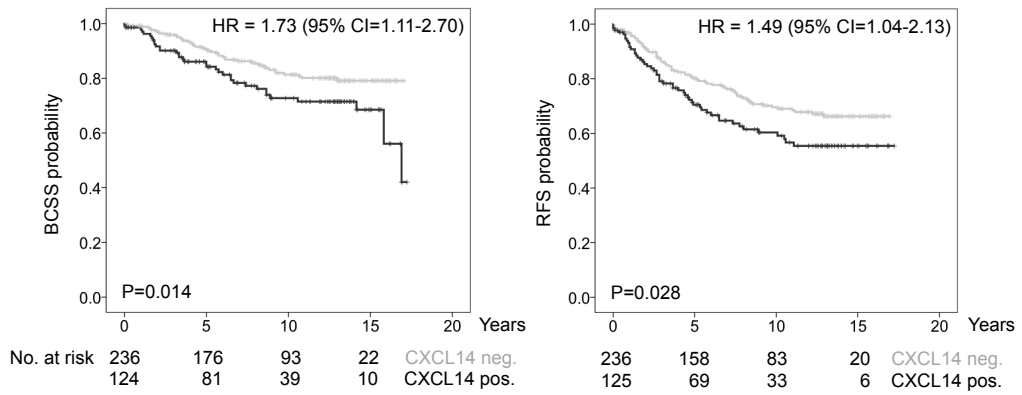

Supplementary Figure 3.

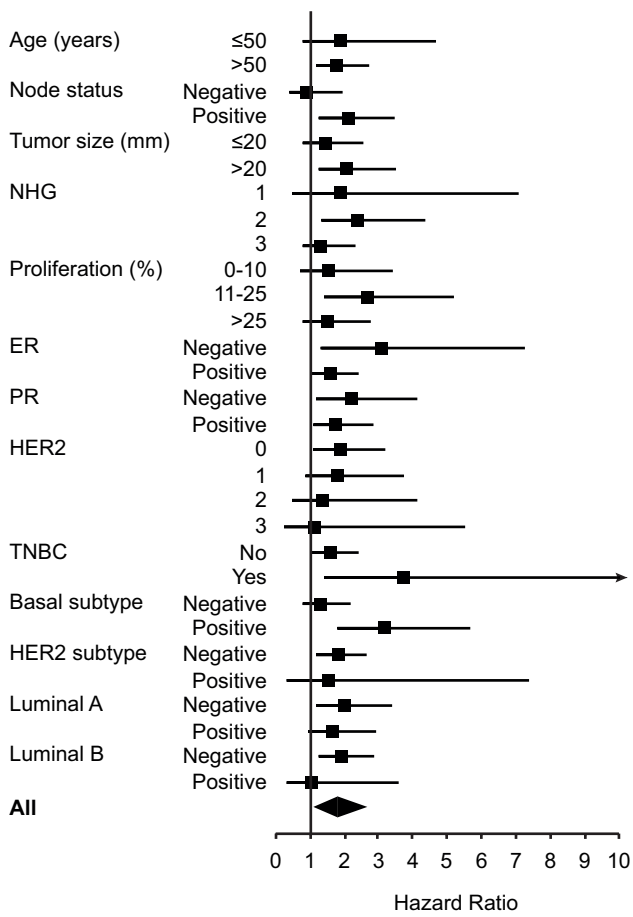

Supplementary Table 1.

| <b>Supplementary Table 1: Associations between total CXCL14 expression and clinicopathological parameters, breast cancer subtypes, adjuvant therapy or stroma abundance.</b>                  |             |            |         |
|-----------------------------------------------------------------------------------------------------------------------------------------------------------------------------------------------|-------------|------------|---------|
| Number (CXCL14 data)                                                                                                                                                                          | N=498 (394) |            |         |
| CXCL14 expression<br>n (%)                                                                                                                                                                    | Negative    | Positive   | p-value |
|                                                                                                                                                                                               | 256 (65)    | 138 (35)   |         |
| <b>Age (years)</b>                                                                                                                                                                            |             |            |         |
| ≤50                                                                                                                                                                                           | 46 (11.7)   | 20 (5.1)   | 0.379   |
| >50                                                                                                                                                                                           | 210 (53.3)  | 118 (29.9) |         |
| <b>Tumor size (mm)</b>                                                                                                                                                                        |             |            |         |
| ≤20                                                                                                                                                                                           | 150 (38.1)  | 83 (21.0)  | 0.765   |
| >20                                                                                                                                                                                           | 106 (26.9)  | 55 (14.0)  |         |
| <b>NHG</b>                                                                                                                                                                                    |             |            |         |
| I                                                                                                                                                                                             | 59 (15.0)   | 34 (8.6)   | 0.705   |
| II                                                                                                                                                                                            | 104 (26.4)  | 55 (14.0)  |         |
| III                                                                                                                                                                                           | 93 (23.6)   | 48 (12.1)  |         |
| Missing                                                                                                                                                                                       | 0 (0)       | 1 (0.3)    |         |
| <b>Node status</b>                                                                                                                                                                            |             |            |         |
| Negative                                                                                                                                                                                      | 148 (37.6)  | 62 (15.7)  | 0.098   |
| Positive                                                                                                                                                                                      | 90 (22.8)   | 55 (14.0)  |         |
| Missing                                                                                                                                                                                       | 18 (4.6)    | 21 (5.3)   |         |
| <b>ER status</b>                                                                                                                                                                              |             |            |         |
| Negative                                                                                                                                                                                      | 44 (11.2)   | 15 (3.8)   | 0.094   |
| Positive                                                                                                                                                                                      | 212 (53.8)  | 123 (31.2) |         |
| <b>PR status</b>                                                                                                                                                                              |             |            |         |
| Negative                                                                                                                                                                                      | 86 (21.8)   | 40 (10.2)  | 0.350   |
| Positive                                                                                                                                                                                      | 170 (43.2)  | 98 (24.8)  |         |
| <b>HER2 status</b>                                                                                                                                                                            |             |            |         |
| 0                                                                                                                                                                                             | 149 (37.8)  | 70 (17.8)  | 0.951   |
| 1                                                                                                                                                                                             | 54 (13.8)   | 41 (10.4)  |         |
| 2                                                                                                                                                                                             | 21 (5.3)    | 18 (4.6)   |         |
| 3                                                                                                                                                                                             | 28 (7.1)    | 7 (1.7)    |         |
| Missing                                                                                                                                                                                       | 4 (1.0)     | 2 (0.5)    |         |
| <b>TNBC</b>                                                                                                                                                                                   |             |            |         |
| No                                                                                                                                                                                            | 18 (4.6)    | 10 (2.5)   | 0.937   |
| Yes                                                                                                                                                                                           | 238 (60.4)  | 128 (32.5) |         |
| <b>Ki67 (%)</b>                                                                                                                                                                               |             |            |         |
| 0-10                                                                                                                                                                                          | 89 (22.6)   | 48 (12.2)  | 0.750   |
| 11-25                                                                                                                                                                                         | 82 (20.8)   | 44 (11.2)  |         |
| >25                                                                                                                                                                                           | 73 (18.6)   | 36 (9.1)   |         |
| Missing                                                                                                                                                                                       | 12 (3.0)    | 10 (2.5)   |         |
| <b>Subtype</b>                                                                                                                                                                                |             |            |         |
| Luminal A                                                                                                                                                                                     | 131 (33.3)  | 76 (19.3)  | 0.982   |
| Luminal B                                                                                                                                                                                     | 22 (5.6)    | 14 (3.6)   |         |
| HER2                                                                                                                                                                                          | 19 (4.8)    | 4 (1.0)    |         |
| Basal                                                                                                                                                                                         | 38 (9.6)    | 26 (6.5)   |         |
| Missing                                                                                                                                                                                       | 46 (11.7)   | 18 (4.6)   |         |
| <b>Adjuvant therapy</b>                                                                                                                                                                       |             |            |         |
| No                                                                                                                                                                                            | 94 (23.9)   | 52 (13.2)  | 0.395   |
| Yes                                                                                                                                                                                           | 109 (27.6)  | 49 (12.4)  |         |
| Missing                                                                                                                                                                                       | 53 (13.5)   | 37 (9.4)   |         |
| <b>Stroma abundance</b>                                                                                                                                                                       |             |            |         |
| 1                                                                                                                                                                                             | 64 (16.3)   | 34 (8.6)   | 0.473   |
| 2                                                                                                                                                                                             | 105 (26.7)  | 67 (17.0)  |         |
| 3                                                                                                                                                                                             | 80 (20.3)   | 35 (8.9)   |         |
| Missing                                                                                                                                                                                       | 7 (1.7)     | 2 (0.5)    |         |
| X <sup>2</sup> test for linear trend. Hormone receptor status was assessed by immunohistochemistry using a cutoff at 10% positive nuclei, according to current clinical guidelines in Sweden. |             |            |         |



Supplementary Table 2.

| Supplementary Table 2: Multivariable analysis for survival data, including total CXCL14 expression. |                                 |             |             |                          |              |          |
|-----------------------------------------------------------------------------------------------------|---------------------------------|-------------|-------------|--------------------------|--------------|----------|
| Number (CXCL14 data)                                                                                |                                 |             | N=498 (394) |                          |              |          |
|                                                                                                     | Breast cancer specific survival |             |             | Recurrence free survival |              |          |
|                                                                                                     | HR                              | 95% CI      | p-value     | HR                       | 95% CI       | p-value  |
| <b>Age (years)</b>                                                                                  |                                 |             |             |                          |              |          |
| ≤50                                                                                                 | 1                               |             |             | 1                        |              |          |
| >50                                                                                                 | 0.798                           | 0.433-1.469 | 0.468       | 0.762                    | 0.473-1.228  | 0.265    |
| <b>Tumor size (mm)</b>                                                                              |                                 |             |             |                          |              |          |
| ≤20                                                                                                 | 1                               |             |             | 1                        |              |          |
| >20                                                                                                 | 1.643                           | 0.988-2.731 | 0.056       | 1.222                    | 0.822-1.818  | 0.321    |
| <b>NHG</b>                                                                                          |                                 |             |             |                          |              |          |
| I                                                                                                   | 1                               |             |             | 1                        |              |          |
| II                                                                                                  | 2.444                           | 0.903-6.618 | 0.079       | 3.064                    | 1.514-6.202  | 0.002*   |
| III                                                                                                 | 6.115                           | 2.318-16.14 | <0.0001*    | 5.707                    | 2.817-11.560 | <0.0001* |
| <b>Node status</b>                                                                                  |                                 |             |             |                          |              |          |
| Negative                                                                                            | 1                               |             |             | 1                        |              |          |
| Positive                                                                                            | 4.238                           | 2.448-7.338 | <0.0001*    | 2.486                    | 1.659-3.724  | <0.0001* |
| <b>ER status</b>                                                                                    |                                 |             |             |                          |              |          |
| Negative                                                                                            | 1                               |             |             | 1                        |              |          |
| Positive                                                                                            | 0.635                           | 0.306-1.318 | 0.223       | 0.982                    | 0.533-1.811  | 0.955    |
| <b>HER2 status</b>                                                                                  |                                 |             |             |                          |              |          |
| 0                                                                                                   | 1                               |             |             | 1                        |              |          |
| 1                                                                                                   | 1.44                            | 0.811-2.557 | 0.213       | 1.492                    | 0.954-2.335  | 0.080    |
| 2                                                                                                   | 1.008                           | 0.423-2.399 | 0.986       | 1.206                    | 0.622-2.338  | 0.579    |
| 3                                                                                                   | 0.809                           | 0.356-1.870 | 0.620       | 0.735                    | 0.361-1.496  | 0.396    |
| <b>Stromal CXCL14</b>                                                                               |                                 |             |             |                          |              |          |
| Negative                                                                                            | 1                               |             |             | 1                        |              |          |
| Positive                                                                                            | 1.860                           | 1.129-3.064 | 0.015*      | 1.525                    | 1.029-2.260  | 0.036*   |

Cox regression analysis using total CXCL14 as categorical variable in multivariable analysis.  
\* p= <0.05
